# Supplementary figures and images for: Low sulfide levels and a high degree of cystathionine β-synthase (CBS) activation by S-adenosylmethionine (SAM) in the long-lived naked mole-rat
Source: PubMed Central journal article supplement — Redox Biol. 2016 Jan 14;8:192–8. doi: 10.1016/j.redox.2016.01.008 (PMC4732021; doi:10.1016/j.redox.2016.01.008), 2016-01-14

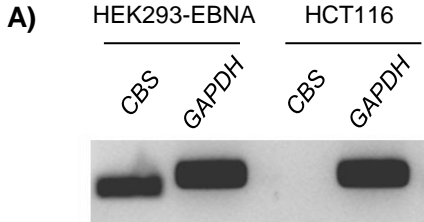

**B)**

| Gene ID           | Read count |
|-------------------|------------|
| <i>CBS</i>        | 0          |
| <i>CTH</i>        | 1          |
| <i>GAPDH</i>      | 8,300      |
| total (all genes) | 21,751,121 |

Supplement: mmc2.pdf [file mmc2.pdf]
